# Supplementary material for: Recognition of the π-hole donor ability of iodopentafluorobenzene – a conventional σ-hole donor for crystal engineering involving halogen bonding
Source: Royal Society of Chemistry journal article supplement (doi:10.1039/c8ce01851k), 2018-12-04
Supplement: c8ce01851k1.pdf [file c8ce01851k1.pdf]

## Supporting Information

### **Recognition of $\pi$ -Hole Donor Ability of Iodopentafluorobenzene – a Conventional $\sigma$ -Hole Donor for Crystal Engineering Involving Halogen Bonding**

Anastasiya A. Eliseeva,<sup>a</sup> Daniil M. Ivanov,<sup>a</sup> Alexander S. Novikov,<sup>a</sup>

Vadim Yu. Kukushkin<sup>a,b\*</sup>

(a) Saint Petersburg State University, Universitetskaya Nab. 7/9, 199034 Saint Petersburg,  
Russian Federation

(b) Institute of Macromolecular Compounds, Russian Academy of Sciences, Bolshoi Pr., 31,  
199004 Saint Petersburg, Russian Federation

**Table S1.** Crystal data and structure refinement for **1** and **1•2IPFB**.

|                                                              | <b>1</b>                                                                      | <b>1•2IPFB</b>                                                    |
|--------------------------------------------------------------|-------------------------------------------------------------------------------|-------------------------------------------------------------------|
| CCDC No.                                                     | 1875983                                                                       | 1875984                                                           |
| Empirical formula                                            | C <sub>32</sub> H <sub>72</sub> I <sub>6</sub> N <sub>2</sub> Pt <sub>2</sub> | C <sub>22</sub> H <sub>36</sub> F <sub>5</sub> I <sub>4</sub> NPt |
| <i>M<sub>w</sub></i> /g                                      | 1636.49                                                                       | 1112.21                                                           |
| T/K                                                          | 100(2)                                                                        | 100(2)                                                            |
| Radiation                                                    | MoK $\alpha$ ( $\lambda$ = 0.71073 Å)                                         | MoK $\alpha$ ( $\lambda$ = 0.71073 Å)                             |
| Crystal color, shape                                         | dark green, prism                                                             | brown, prism                                                      |
| Crystal size/mm <sup>3</sup>                                 | 0.20 × 0.16 × 0.09                                                            | 0.15 × 0.10 × 0.08                                                |
| Crystal system                                               | monoclinic                                                                    | triclinic                                                         |
| Space group                                                  | P2 <sub>1</sub> /c                                                            | P-1                                                               |
| <i>a</i> /Å                                                  | 14.5589(3)                                                                    | 9.3533(5)                                                         |
| <i>b</i> /Å                                                  | 13.8558(3)                                                                    | 12.0866(7)                                                        |
| <i>c</i> /Å                                                  | 23.7553(4)                                                                    | 14.5096(6)                                                        |
| $\alpha$ /°                                                  | 90                                                                            | 80.144(4)                                                         |
| $\beta$ /°                                                   | 101.602(2)                                                                    | 75.835(4)                                                         |
| $\gamma$ /°                                                  | 90                                                                            | 78.965(5)                                                         |
| <i>V</i> /Å <sup>3</sup>                                     | 4694.13(16)                                                                   | 1547.65(14)                                                       |
| <i>Z</i>                                                     | 4                                                                             | 2                                                                 |
| $\rho_c$ /g·cm <sup>-3</sup>                                 | 2.316                                                                         | 2.387                                                             |
| $\mu$ /mm <sup>-1</sup>                                      | 9.922                                                                         | 8.564                                                             |
| <i>F</i> (000)                                               | 3008.0                                                                        | 1020.0                                                            |
| 2 $\theta$ range/°                                           | 5.004 to 54.998                                                               | 5.268 to 57                                                       |
| Reflections collected                                        | 33422                                                                         | 15865                                                             |
| Independent reflections                                      | 10760 [R <sub>int</sub> = 0.0290,<br>R <sub>sigma</sub> = 0.0301]             | 7859 [R <sub>int</sub> = 0.0309,<br>R <sub>sigma</sub> = 0.0441]  |
| Data/restraints/parameters                                   | 10760/0/387                                                                   | 7859/0/302                                                        |
| Goodness-of-fit on <i>F</i> <sup>2</sup>                     | 1.046                                                                         | 1.047                                                             |
| Final <i>R</i> indexes [ <i>I</i> ≥ 2 $\sigma$ ( <i>I</i> )] | R <sub>1</sub> = 0.0219, wR <sub>2</sub> =<br>0.0385                          | R <sub>1</sub> = 0.0321, wR <sub>2</sub> = 0.0729                 |
| Final <i>R</i> indexes [all data]                            | R <sub>1</sub> = 0.0299, wR <sub>2</sub> =<br>0.0406                          | R <sub>1</sub> = 0.0424, wR <sub>2</sub> = 0.0792                 |
| Largest diff. peak/hole / e·Å <sup>-3</sup>                  | 0.83/−0.67                                                                    | 2.37/−1.42                                                        |

**Table S2.** Bond lengths for the  $[\text{Pt}_2(\mu\text{-I}_2)\text{I}_4]^{2-}$  anion in **1** and **1•2IPFB**.

| Atoms    | Length, Å | Atoms               | Length, Å |
|----------|-----------|---------------------|-----------|
| <b>1</b> |           | <b>1•2IPFB</b>      |           |
| Pt1–I4   | 2.5879(3) | Pt1–I1              | 2.5792(4) |
| Pt1–I3   | 2.5938(3) | Pt1–I1 <sup>l</sup> | 2.6036(4) |
| Pt1–I2   | 2.5989(3) | Pt1–I2              | 2.5972(4) |
| Pt1–I1   | 2.6060(3) | Pt1–I3              | 2.6049(4) |
| Pt2–I4   | 2.5896(3) | I1–Pt1 <sup>l</sup> | 2.6036(4) |
| Pt2–I3   | 2.5924(3) |                     |           |
| Pt2–I6   | 2.6004(3) |                     |           |
| Pt2–I5   | 2.6069(3) |                     |           |

<sup>l</sup> 2–X,2–Y,1–Z**Table S3.** Bond angles for the  $[\text{Pt}_2(\mu\text{-I}_2)\text{I}_4]^{2-}$  anion in **1** and **1•2IPFB**.

| Atoms      | Angle, °    | Atoms                   | Angle, °    |
|------------|-------------|-------------------------|-------------|
| <b>1</b>   |             | <b>1•2IPFB</b>          |             |
| I3–Pt2–I6  | 174.696(9)  | I1 <sup>l</sup> –Pt1–I3 | 174.174(12) |
| I3–Pt2–I5  | 91.209(8)   | I1–Pt1–I3               | 90.771(12)  |
| I6–Pt2–I5  | 94.030(9)   | I2–Pt1–I3               | 92.234(12)  |
| I4–Pt2–I3  | 84.769(8)   | I1–Pt1–I1 <sup>l</sup>  | 84.486(12)  |
| I4–Pt2–I6  | 89.997(9)   | I2–Pt1–I1 <sup>l</sup>  | 92.683(12)  |
| I4–Pt2–I5  | 175.962(10) | I1–Pt1–I2               | 175.776(13) |
| Pt2–I3–Pt1 | 95.115(8)   | Pt1–I1–Pt1 <sup>l</sup> | 95.514(12)  |
| Pt1–I4–Pt2 | 95.328(8)   |                         |             |
| I2–Pt1–I1  | 93.904(9)   |                         |             |
| I4–Pt1–I1  | 175.471(9)  |                         |             |
| I4–Pt1–I3  | 84.776(8)   |                         |             |
| I4–Pt1–I2  | 90.449(8)   |                         |             |
| I3–Pt1–I2  | 174.978(9)  |                         |             |
| I3–Pt1–I1  | 90.905(8)   |                         |             |

<sup>l</sup> 2–X,2–Y,1–Z

**Table S4.** CSD search for noncovalent interactions involving IPFB.

| CCDC Code     | Fragment of Adduct                                       | Atoms    | Distance, <i>d</i><br>(Å) | Angle, °                                             | Type of contact | Refs |
|---------------|----------------------------------------------------------|----------|---------------------------|------------------------------------------------------|-----------------|------|
| <b>NEHCUB</b> | (IPFB)•(fluoranthene)                                    | H2•••F2  | 2.533                     | C9–H2•••F2 = 137.03                                  | HB              | 1    |
|               |                                                          | H4•••F5  | 2.603                     | C11–H4•••F5 = 131.18                                 |                 |      |
|               |                                                          | H1•••F4  | 2.636                     | C8–H1•••F4 = 157.96                                  |                 |      |
|               |                                                          | C3•••C13 | 3.374(4)                  |                                                      | π-stacking      |      |
|               |                                                          | C4•••C17 | 3.353(4)                  |                                                      |                 |      |
|               |                                                          | C2•••C21 | 3.382(4)                  |                                                      |                 |      |
|               | (IPFB)•(IPFB)                                            | I1•••I1  | 3.6833(5)                 | C1–I1•••I1 = 139.14(7)                               | I type contact  |      |
|               |                                                          | F5•••F5  | 2.775(4)                  | C6–F5•••F5 = 134.16(17)                              | contact         |      |
| <b>AXURUI</b> | (IPFB)•[1,2,3]triazalo-<br>[3,5-α]quinolone              | I1•••N3  | 3.0661(16)                | C11–I1•••N3 = 167.49(6)                              | XB              | 2    |
|               |                                                          | H5•••I1  | 3.1724(4)                 | C7–H5•••I1 = 132.71                                  | HB              |      |
|               |                                                          | H1•••F4  | 2.435                     | C1–H1•••F4 = 136.74                                  | HB              |      |
|               |                                                          | H5•••F1  | 2.626                     | C7–H5•••F1 = 160.51                                  |                 |      |
|               |                                                          | H6•••F3  | 2.479                     | C8–H6•••F3 = 144.25                                  |                 |      |
|               |                                                          | C16•••C4 | 3.290(3)                  |                                                      | π-stacking      |      |
|               |                                                          | C12•••C4 | 3.314(3)                  |                                                      |                 |      |
|               |                                                          | C13•••C6 | 3.290(3)                  |                                                      |                 |      |
|               | (IPFB)•(IPFB)                                            | F1•••F2  | 2.8699(15)                | C12–F1•••F2 = 143.00(12)<br>C13–F2•••F1 = 155.83(11) | contact         |      |
|               |                                                          | F5•••F5  | 2.588(2)                  | C16–F5•••F5 = 163.90(13)                             |                 |      |
| <b>CUPKII</b> | (IPFB)•(4-( <i>N,N</i> -<br>dimethylamino)pyridi-<br>ne) | I1•••N1  | 2.693(3)                  | C1–I1•••N1 = 178.43(11)                              | XB              | 3    |
|               |                                                          | H9•••F4  | 2.539                     | C13–H9•••F4 = 132.6                                  | HB              |      |
|               |                                                          | H2•••F5  | 2.633                     | C8–H2•••F5 = 141.6                                   |                 |      |
|               |                                                          | C5•••C11 | 3.317(5)                  |                                                      | π-stacking      |      |

|                 |                                        |            |                                                         |                                                   |              |   |
|-----------------|----------------------------------------|------------|---------------------------------------------------------|---------------------------------------------------|--------------|---|
| <b>EBIHEF</b>   | (IPFB)•(2,4,6-trimethylbenzotrile)     | I1•••N1    | 3.092(4)                                                | C1–I1•••N1 = 175.97(10)                           | XB           | 4 |
|                 |                                        | C14•••F3   | 3.108(7)                                                | C4–F3•••C14 = 168.9(3)<br>C10–C14•••F3 = 175.8(3) | contact      |   |
|                 |                                        | H4•••F5    | 2.583                                                   | C13–H4•••F5 = 145.7(3)                            | HB           |   |
|                 | (IPFB)•(IPFB)                          | F2•••F2    | 2.917(6)                                                | C3–F2•••F2 = 140.2(3)                             | contact      |   |
| <b>FUYFAI03</b> | (IPFB)•(1,4-diazabicyclo[2.2.2]octane) | I1•••N1    | 2.6813(13)                                              | C1–I1•••N1 = 177.96(5)                            | XB           | 5 |
|                 |                                        | I2•••N2    | 2.6819(13)                                              | C7–I2•••N2 = 178.64(5)                            |              |   |
|                 |                                        | I3•••N3    | 2.7011(13)                                              | C19–I3•••N3 = 177.19(5)                           |              |   |
|                 |                                        | I4•••N4    | 2.7134(13)                                              | C25–I4•••N4 = 177.04(5)                           |              |   |
|                 |                                        | C17•••F16  | 2.9201(18)                                              | C26–F16•••C17 = 164.97(9)                         | contact      |   |
|                 |                                        | C18•••F16  | 2.9783(18)                                              | C26–F16•••C18 = 138.12(9)                         |              |   |
|                 |                                        | C32•••F15  | 3.0020(18)                                              | C24–F15•••C32 = 157.97(10)                        |              |   |
|                 |                                        | C31•••F15  | 3.0341(18)                                              | C24–F15•••C31 = 144.91(9)                         |              |   |
|                 |                                        | H21•••F10  | 2.526                                                   | C35–H21•••F10 = 134.83                            | HB           |   |
|                 |                                        | H4•••F1    | 2.585                                                   | C14–H4•••F1 = 134.22                              |              |   |
|                 |                                        | H6•••F3    | 2.587                                                   | C15–H6•••F3 = 135.32                              |              |   |
|                 |                                        | H23•••F14  | 2.603                                                   | C36–H23•••F14 = 148.62                            |              |   |
|                 |                                        | H9•••F16   | 2.625                                                   | C17–H9•••F16 = 97.27                              |              |   |
|                 | H7•••F12                               | 2.651      | C16–H7•••F12 = 176.96                                   |                                                   |              |   |
|                 | (IPFB)•(IPFB)                          | C10•••I1   | 3.6683(17)                                              | C1–I1•••C10 = 76.48(5)                            |              |   |
|                 |                                        | C4•••I2    | 3.6618(16)                                              | C7–I2•••C4 = 75.75(5)                             |              |   |
|                 |                                        | C28•••I3   | 3.5606(17)                                              | C19–I3•••C28 = 75.68(5)                           |              |   |
|                 |                                        | C22•••I4   | 3.6436(16)                                              | C25–I4•••C22 = 75.09(5)                           | lp(F)– $\pi$ |   |
|                 |                                        | C26•••F15  | 3.1350(18)                                              | C24–F15•••C26 = 110.91(9)                         |              |   |
|                 |                                        | C24•••F16  | 3.1634(18)                                              | C26–F16•••C24 = 109.34(9)                         | contact      |   |
|                 | F18•••F20                              | 2.6145(15) | C28–F18•••F20 = 142.39(11)<br>C30–F20•••F18 = 160.48(9) |                                                   |              |   |

|                 |                                        |                       |            |                                                          |                 |   |
|-----------------|----------------------------------------|-----------------------|------------|----------------------------------------------------------|-----------------|---|
|                 |                                        | F3...F11              | 2.7441(14) | C4-F3...F11 = 124.51(10)<br>C20-F11...F3 = 158.94(9)     |                 |   |
|                 |                                        | F2...F7               | 2.7718(15) | C3-F2...F7 = 122.40(9)<br>C9-F7...F2 = 141.92(10)        |                 |   |
|                 |                                        | F9...F12              | 2.7870(14) | C11-F9...F12 = 127.59(9)<br>C21-F12...F9 = 126.25(9)     |                 |   |
|                 |                                        | F14...F19             | 2.8286(15) | C23-F14...F19 = 137.51(10)<br>C29-F19...F14 = 158.92(11) |                 |   |
|                 |                                        | F4...F17              | 2.8437(15) | C5-F4...F17 = 162.60(10)<br>C27-F17...F4 = 130.81(9)     |                 |   |
|                 |                                        | F5...F13              | 2.8610(14) | C6-F5...F13 = 148.55(9)<br>C22-F13...F5 = 144.04(10)     |                 |   |
|                 |                                        | C20...C26             | 3.351      |                                                          | $\pi$ -stacking |   |
| <b>FUYFAI04</b> | (IPFB)•(1,4-diazabicyclo[2.2.2]octane) | I1...N1               | 2.690(3)   | C1-I1...N1 = 178.00(9)                                   | XB              | 5 |
|                 |                                        | I2...N2               | 2.684(2)   | C7-I2...N2 = 178.79(10)                                  |                 |   |
|                 |                                        | I3...N3               | 2.706(2)   | C19-I3...N3 = 177.48(9)                                  |                 |   |
|                 |                                        | I4...N4               | 2.716(3)   | C25-I4...N4 = 177.09(9)                                  |                 |   |
|                 |                                        | C17...F16             | 2.943(3)   | C26-F16...C17 = 165.33(16)                               | contact         |   |
|                 |                                        | C18...F16             | 2.999(3)   | C26-F16...C18 = 138.63(16)                               |                 |   |
|                 |                                        | C32...F15             | 3.009(3)   | C24-F15...C32 = 158.45(18)                               |                 |   |
|                 |                                        | C31...F15             | 3.045(3)   | C24-F15...C31 = 145.10(16)                               |                 |   |
|                 |                                        | H21...F10             | 2.539      | C35-H21...F10 = 135.87                                   | HB              |   |
|                 |                                        | H4...F1               | 2.618      | C14-H4...F1 = 134.26                                     |                 |   |
|                 |                                        | H6...F3               | 2.605      | C15-H6...F3 = 136.81                                     |                 |   |
|                 |                                        | H23...F14             | 2.623      | C36-H23...F14 = 148.35                                   |                 |   |
|                 |                                        | H9...F16              | 2.646      | C17-H9...F16 = 97.44                                     |                 |   |
| H7...F12        | 2.670                                  | C16-H7...F12 = 176.72 |            |                                                          |                 |   |

|                 |                                        |           |                 |                                                        |              |   |
|-----------------|----------------------------------------|-----------|-----------------|--------------------------------------------------------|--------------|---|
|                 | (IPFB)•(IPFB)                          | C10•••I1  | 3.681(4)        | C1–I1•••C10 = 76.37(11)                                | lp(I)– $\pi$ |   |
|                 |                                        | C4•••I2   | 3.668(3)        | C7–I2•••C4 = 75.78(10)                                 |              |   |
|                 |                                        | C28•••I3  | 3.579(3)        | C19–I3•••C28 = 75.75(8)                                |              |   |
|                 |                                        | C22•••I4  | 3.649(3)        | C25–I4•••C22 = 74.99(9)                                |              |   |
|                 |                                        | F18•••F20 | 2.625(3)        | C28–F18•••F20 = 142.1(2)<br>C30–F20•••F18 = 161.07(18) | contact      |   |
|                 |                                        | F3•••F11  | 2.754(2)        | C4–F3•••F11 = 124.94(16)<br>C20–F11•••F3 = 159.99(17)  |              |   |
|                 |                                        | F2•••F7   | 2.774(3)        | C3–F2•••F7 = 123.01(18)<br>C9–F7•••F2 = 142.5(2)       |              |   |
|                 |                                        | F9•••F12  | 2.796(3)        | C11–F9•••F12 = 127.91(18)<br>C21–F12•••F9 = 127.70(17) |              |   |
|                 |                                        | F14•••F19 | 2.835(3)        | C23–F14•••F19 = 137.5(2)<br>C29–F19•••F14 = 158.6(2)   |              |   |
|                 |                                        | F4•••F17  | 2.850(3)        | C5–F4•••F17 = 162.46(17)<br>C27–F17•••F4 = 131.12(19)  |              |   |
|                 |                                        | F5•••F13  | 2.863(3)        | C6–F5•••F13 = 149.72(16)<br>C22–F13•••F5 = 144.17(17)  |              |   |
| C20•••C26       | 3.374                                  |           | $\pi$ -stacking |                                                        |              |   |
| <b>FUYFAI05</b> | (IPFB)•(1,4-diazabicyclo[2.2.2]octane) | I1•••N1   | 2.711(5)        | C1–I1•••N1 = 177.95(15)                                | XB           | 5 |
|                 |                                        | I2•••N2   | 2.690(5)        | C7–I2•••N2 = 178.58(18)                                |              |   |
|                 |                                        | I3•••N3   | 2.723(5)        | C19–I3•••N3 = 177.74(19)                               |              |   |
|                 |                                        | I4•••N4   | 2.711(5)        | C25–I4•••N4 = 178.03(15)                               |              |   |
|                 |                                        | C17•••F16 | 2.972(6)        | C26–F16•••C17 = 165.2(4)                               | contact      |   |
|                 |                                        | C18•••F16 | 3.017(6)        | C26–F16•••C18 = 140.1(4)                               |              |   |
|                 |                                        | C32•••F15 | 2.990(5)        | C24–F15•••C32 = 160.0(3)                               |              |   |
|                 |                                        | C31•••F15 | 3.030(5)        | C24–F15•••C31 = 144.9(3)                               |              |   |

|                 |                                        |           |                 |                                                      |              |   |
|-----------------|----------------------------------------|-----------|-----------------|------------------------------------------------------|--------------|---|
|                 |                                        | H21...F10 | 2.630           | C35–H21...F10 = 135.6                                | HB           |   |
|                 |                                        | H4...F1   | 2.656           | C14–H4...F1 = 135.5                                  |              |   |
|                 |                                        | H6...F3   | 2.631           | C15–H6...F3 = 140.3                                  |              |   |
|                 | (IPFB)•(IPFB)                          | C4...I2   | 3.675(6)        | C7–I2...C4 = 75.32(19)                               | lp(I)– $\pi$ |   |
|                 |                                        | C28...I3  | 3.616(7)        | C19–I3...C28 = 75.85(18)                             |              |   |
|                 |                                        | C22...I4  | 3.642(6)        | C25–I4...C22 = 75.18(16)                             |              |   |
|                 |                                        | F18...F20 | 2.648(6)        | C28–F18...F20 = 141.0(5)<br>C30–F20...F18 = 163.7(3) | contact      |   |
|                 |                                        | F3...F11  | 2.766(5)        | C4–F3...F11 = 127.0(3)<br>C20–F11...F3 = 162.6(3)    |              |   |
|                 |                                        | F2...F7   | 2.786(5)        | C3–F2...F7 = 123.6(3)<br>C9–F7...F2 = 142.5(2)       |              |   |
|                 |                                        | F9...F12  | 2.791(5)        | C11–F9...F12 = 128.3(4)<br>C21–F12...F9 = 131.4(4)   |              |   |
|                 |                                        | F14...F19 | 2.828(6)        | C23–F14...F19 = 135.6(4)<br>C29–F19...F14 = 158.4(5) |              |   |
|                 |                                        | F4...F17  | 2.845(5)        | C5–F4...F17 = 162.1(3)<br>C27–F17...F4 = 131.2(4)    |              |   |
|                 |                                        | F5...F13  | 2.865(6)        | C6–F5...F13 = 152.3(3)<br>C22–F13...F5 = 144.8(4)    |              |   |
| C20...C26       | 3.400                                  |           | $\pi$ -stacking |                                                      |              |   |
| <b>FUYFAI06</b> | (IPFB)•(1,4-diazabicyclo[2.2.2]octane) | I4...N4   | 2.695(5)        | C25–I4...N4 = 177.92(16)                             | XB           | 5 |
|                 |                                        | F28...F30 | 2.669(7)        | C46–F28...F30 = 140.6(5)<br>C48–F30...F28 = 164.8(4) |              |   |
|                 | (IPFB)•(IPFB)                          | F4...F27  | 2.855(6)        | C5–F4...F27 = 160.9(3)                               | contact      |   |



|               |                                   |               |                                                   |                           |                                                     |   |
|---------------|-----------------------------------|---------------|---------------------------------------------------|---------------------------|-----------------------------------------------------|---|
|               |                                   |               |                                                   | C45–F27•••F4 = 130.4(3)   |                                                     |   |
| <b>GAJRER</b> | (IPFB)•(2,1,3-benzoselenadiazole) | I1•••N2       | 3.073(3)                                          | C4–I1•••N2 = 171.17(14)   | XB                                                  | 6 |
|               |                                   | I2•••N3       | 2.961(3)                                          | C9–I2•••N3 = 174.76(11)   |                                                     |   |
|               |                                   | Se1•••F8      | 3.289(2)                                          | C11–F8•••Se1 = 129.06(19) | ChB                                                 |   |
|               |                                   | Se2•••F1      | 3.308(2)                                          | C6–F1•••Se2 = 128.23(19)  | contact                                             |   |
|               |                                   | H5•••F10      | 2.393                                             | C20–H5•••F10 = 161.67     | HB                                                  |   |
|               |                                   | H1•••F9       | 2.448                                             | C14–H1•••F9 = 136.4       |                                                     |   |
|               |                                   | H3•••F1       | 2.491                                             | C17–H3•••F1 = 138.8       |                                                     |   |
|               |                                   | H6•••F7       | 2.555                                             | C21–H6•••F7 = 156.9       |                                                     |   |
|               |                                   | H7•••F4       | 2.606                                             | C23–H7•••F4 = 130.0       |                                                     |   |
|               |                                   | C8•••C18      | 3.341                                             |                           |                                                     |   |
|               |                                   | C11•••C16     | 3.345                                             |                           |                                                     |   |
|               |                                   | C10•••C17     | 3.379                                             |                           |                                                     |   |
|               |                                   | C9•••C18      | 3.392                                             |                           |                                                     |   |
|               |                                   | (IPFB)•(IPFB) | I1•••F8                                           | 3.450(2)                  | C4–I1•••F8 = 125.96(13)<br>C11–F8•••I1 = 144.02(19) |   |
| F3•••F7       | 2.706(3)                          |               | C3–F3•••F7 = 160.1(2)<br>C7–F7•••F3 = 160.2(3)    |                           |                                                     |   |
| F9•••F9       | 2.872(5)                          |               | C12–F9•••F9 = 109.2(2)                            |                           |                                                     |   |
| F5•••F6       | 2.902(3)                          |               | C1–F5•••F6 = 107.62(18)<br>C10–F6•••F5 = 141.0(2) |                           |                                                     |   |
| <b>GUQQIU</b> | (IPFB)•pyrene                     | H7•••I1       | 3.049                                             | C16–H7•••I1 = 126.5       | HB                                                  | 7 |
|               |                                   | H6•••F5       | 2.545                                             | C15–H6•••F5 = 134.9       | HB                                                  |   |
|               |                                   | H9•••F4       | 2.578                                             | C19–H9•••F4 = 152.2       |                                                     |   |
|               |                                   | H2•••F2       | 2.615                                             | C8–H2•••F2 = 141.9        |                                                     |   |
|               |                                   | C4•••C18      | 3.242                                             |                           | $\pi$ -stacking                                     |   |
|               |                                   | C4•••C14      | 3.291                                             |                           |                                                     |   |

|               |                                  |                 |            |                                                    |              |   |
|---------------|----------------------------------|-----------------|------------|----------------------------------------------------|--------------|---|
|               |                                  | C5•••C17        | 3.338      |                                                    |              |   |
|               |                                  | C5•••C16        | 3.340      |                                                    |              |   |
| <b>IKIXOR</b> | (IPFB1)•complex Pt <sup>IV</sup> | I2•••I1         | 3.5716(9)  | C19–I2•••I1 = 173.5(2)                             | XB           | 8 |
|               | (IPFB2)•complex Pt <sup>IV</sup> | I3•••N3         | 2.849(6)   | C25–I3•••N3 = 176.5(3)                             | XB           |   |
|               |                                  | F9•••C11        | 3.179(6)   | C11–C11•••F9 = 124.0(2)<br>C27–F9•••C11 = 173.2(7) | contact      |   |
|               |                                  | H17•••F8        | 2.543      | C16–H17•••F8 = 154.4                               | HB           |   |
|               |                                  | H12•••F6        | 2.606      | C6–H12•••F6 = 133.8                                |              |   |
|               | (IPFB1)•(IPFB2)                  | F2•••F7         | 2.851(12)  | C21–F2•••F7 = 140.4(6)<br>C29–F7•••F2 = 158.1(5)   | contact      |   |
| <b>IKIYAE</b> | (IPFB1)•complex Pt <sup>IV</sup> | I3•••I2         | 3.4954(8)  | C51–I3•••I2 = 170.95(18)                           | XB           | 8 |
|               |                                  | H7•••F2         | 2.412(5)   | C13–H7•••F2 = 153.1                                | HB           |   |
|               |                                  | H5•••F3         | 2.410      | C9–H5•••F3 = 143.9                                 |              |   |
|               | (IPFB2)•complex Pt <sup>IV</sup> | I4•••N3         | 2.886(8)   | C57–I4•••N3 = 176.4(2)                             | XB           |   |
|               |                                  | H29•••I4        | 3.090      | C30–H29•••I4 = 142.2                               | HB           |   |
|               | (IPFB1)•(IPFB2)                  | F4•••F7         | 2.804(9)   | C55–4•••F7 = 162.6(5)<br>C58–F7•••F4 = 150.5(6)    | contact      |   |
|               |                                  | C29•••I3        | 3.679(9)   | C51–I3•••C60 = 80.2(3)                             | lp(I)– $\pi$ |   |
| <b>IKIYEI</b> | (IPFB1)•complex Pt <sup>IV</sup> | I2•••N3         | 2.784(9)   | C26–I2•••N3 = 175.4(4)                             | XB           | 8 |
|               | (IPFB2)•complex Pt <sup>IV</sup> | I3•••I1         | 3.4179(10) | C32–I3•••I1 = 168.6(3)                             | XB           |   |
|               |                                  | H21•••F6        | 2.597      | C21–H21•••F6 = 135.2                               | HB           |   |
|               |                                  | H17•••F10       | 2.653      | C16–H17•••F10 = 128.1                              |              |   |
|               |                                  | H25•••F7        | 2.668      | C25–H25•••F7 = 114.0                               |              |   |
|               |                                  | (IPFB1)•(IPFB1) | F2•••F2    | 2.649(16)                                          |              |   |
|               | (IPFB2)•(IPFB2)                  | F8•••F8         | 2.849(17)  | C35–F8•••F8 = 112.3(8)                             | contact      |   |
|               |                                  | F8•••F9         | 2.901(11)  | C35–F8•••F9 = 148.1(9)<br>C36–F9•••F8 = 112.0(7)   |              |   |

|               |                                                                             |           |           |                                                    |                 |    |
|---------------|-----------------------------------------------------------------------------|-----------|-----------|----------------------------------------------------|-----------------|----|
|               | (IPFB2)•(IPFB1)                                                             | F9•••F2   | 2.931(13) | C36–F9•••F2 = 89.1(7)<br>C28–F2•••F9 = 90.2(7)     | contact         |    |
|               |                                                                             | C33•••C28 | 3.396     |                                                    | $\pi$ -stacking |    |
| <b>IQEWIK</b> | (IPFB)•(4'-Octyloxy-4-stilbazole)                                           | I1•••N1   | 2.811(3)  | C6–I1•••N1 = 168.40(10)                            | XB              | 9  |
|               |                                                                             | H12•••F2  | 2.524     | C20–H12•••F2 = 119.19                              | HB              |    |
|               |                                                                             | H2•••F5   | 2.550     | C8–H2•••F5 = 167.50                                |                 |    |
|               |                                                                             | H6•••F5   | 2.617     | C13–H6•••F5 = 171.55                               |                 |    |
|               | (IPFB)•(IPFB)                                                               | F3•••F4   | 2.821(3)  | C3–F3•••F4 = 169.17(18)<br>C4–F4•••F3 = 125.19(17) | contact         |    |
| <b>KAGKEI</b> | (IPFB)•(tris(dialky1-amino)sulfonium perfluoro-2-methyl-2-pentyl carbanion) | I1•••F1   | 2.455(4)  | C7–I1•••F1 = 175.6(3)                              | XB              | 10 |
|               |                                                                             | I2•••F1   | 2.509(4)  | C13–I2•••F1 = 176.8(3)                             |                 |    |
|               |                                                                             | H5•••F9   | 2.478     | C2–H5•••F9 = 144.7                                 | HB              |    |
|               |                                                                             | F10•••F8  | 2.817(8)  | C17–F10•••F8 = 87.3(4)<br>C15–F8•••F10 = 141.0(7)  | contact         |    |
|               |                                                                             | F8•••F2   | 2.824(8)  | C15–F8•••F2 = 83.0(4)<br>C8–F2•••F8 = 145.3(5)     |                 |    |
|               | (IPFB)•(IPFB)                                                               | C17•••F8  | 3.066(10) | C15–F8•••C17 = 137.4(7)                            | lp(F)– $\pi$    |    |
| <b>LEZPIQ</b> | (IPFB)•(2,4,6-trimethylpyridine)                                            | I1•••N1   | 2.863(3)  | C1–I1•••N1 = 180.00                                | XB              | 11 |
|               |                                                                             | H4•••F1   | 2.636     | C8–H4•••F1 = 153.29                                | HB              |    |
|               |                                                                             | H1•••F1   | 2.658     | C6–H1•••F1 = 145.28                                |                 |    |
|               | (IPFB)•(IPFB)                                                               | C2•••F1   | 3.139(2)  | C2–F1•••C2 = 115.21(10)                            | lp(F)– $\pi$    |    |
|               |                                                                             | F1•••F1   | 2.840(2)  | C2–F1•••F1 = 89.77(12)                             | contact         |    |
| <b>LEZPOW</b> | (IPFB)•(2,6-dimethylpyridine)                                               | I1•••N1   | 2.961(2)  | C1–I1•••N1 = 180.00                                | XB              | 11 |
|               |                                                                             | H5•••F1   | 2.485     | C8–H5•••F1 = 153.03                                | HB              |    |
|               |                                                                             | H2•••F3   | 2.526     | C7–H2•••F3 = 180.00                                |                 |    |
|               | (IPFB)•(IPFB)                                                               | F1•••F1   | 2.777(3)  | C2–F1•••F1 = 98.09(13)                             | contact         |    |
| <b>LEZPUC</b> | (IPFB)•(3,5-                                                                | I1•••N1   | 2.831(3)  | C1–I1•••N1 = 180.00                                | XB              | 11 |

|                 |                               |           |          |                                                    |                 |    |
|-----------------|-------------------------------|-----------|----------|----------------------------------------------------|-----------------|----|
|                 | dimethylpyridine)             | H2•••F3   | 2.422    | C7–H2•••F3 = 180.0                                 | HB              |    |
| <b>LEZPUC01</b> | (IPFB)•(3,5-dimethylpyridine) | I1•••N1   | 2.841(9) | C8–I1•••N1 = 178.7(4)                              | XB              | 11 |
|                 |                               | H2•••F3   | 2.476    | C3–H2•••F3 = 172.2                                 | HB              |    |
|                 |                               | C13•••C3  | 3.395    |                                                    | $\pi$ -stacking |    |
|                 | (IPFB)•(IPFB)                 | F4•••F4   | 2.825    | C12–F4•••F4 = 95.3(9)                              | contact         |    |
| <b>LEZQAJ</b>   | (IPFB)•(4-methylpyridine)     | I1•••N1   | 2.841(9) | C1–I1•••N1 = 173.89(9)                             | XB              | 11 |
|                 |                               | H7•••I1   | 3.140    | C12–H7•••I1 = 149.9                                | HB              |    |
|                 |                               | H3•••F5   | 2.469    | C10–H3•••F5 = 146.05                               |                 |    |
|                 | (IPFB)•(IPFB)                 | F2•••F3   | 2.902(3) | C3–F2•••F3 = 120.00(16)<br>C4–F3•••F2 = 150.81(19) | contact         |    |
| <b>LINTUZ</b>   | (IPFB1)•(pyridyl macrocycle)  | I1•••O1   | 2.719(2) | C29–I1•••O1 = 173.72(7)                            | XB              | 12 |
|                 |                               | C6•••F4   | 3.098(3) | C33–F4•••C6 = 156.8(2)                             | contact         |    |
|                 |                               | C7•••F4   | 3.140(3) | C33–F4•••C7 = 131.36(19)                           |                 |    |
|                 |                               | C37•••F1  | 3.153(4) | C30–F1•••C37 = 118.47(15)                          |                 |    |
|                 |                               | H17•••F5  | 2.487    | C14–H17•••F5 = 140.54                              | HB              |    |
|                 |                               | H24•••F2  | 2.529    | C22–H24•••F2 = 137.00                              |                 |    |
|                 |                               | H7•••F4   | 2.569    | C6–H7•••F4 = 115.4                                 |                 |    |
|                 |                               | H8•••F4   | 2.664    | C7–H8•••F4 = 111.6                                 |                 |    |
|                 | (IPFB2)•(pyridyl macrocycle)  | I2•••O2   | 2.745(2) | C35–I2•••O2 = 177.13(8)                            | XB              |    |
|                 |                               | C3•••F6   | 3.154(3) | C36–F6•••C3 = 127.4(2)                             | contact         |    |
|                 |                               | H14•••F7  | 2.601    | C13–H14•••F7 = 120.11                              | HB              |    |
|                 |                               | H3•••F6   | 2.622    | C3–H3•••F6 = 113.84                                |                 |    |
|                 | (IPFB3)•(pyridyl macrocycle)  | I3•••N6   | 3.001(3) | C41–I3•••N6 = 169.32(10)                           | XB              |    |
|                 |                               | H26•••F11 | 2.650    | C23–H26•••F11 = 140.5                              | HB              |    |
|                 |                               | C46•••C7  | 3.380    |                                                    | $\pi$ -stacking |    |
|                 |                               | C43•••C8  | 3.381    |                                                    |                 |    |
|                 | (IPFB)•(IPFB)                 | F1•••F8   | 2.915    | C30–F1•••F8 = 128.31(19)                           | contact         |    |

|               |                                                           |           |            |                                                      |              |    |
|---------------|-----------------------------------------------------------|-----------|------------|------------------------------------------------------|--------------|----|
|               |                                                           |           |            | C38–F8•••F1 = 89.98(17)                              |              |    |
|               |                                                           | F1•••F7   | 2.797(3)   | C30–F1•••F7 = 93.48(14)<br>C37–F7•••F1 = 92.28(18)   |              |    |
|               |                                                           | F5•••F5   | 2.797(4)   | C34–F5•••F5 = 110.99(16)                             |              |    |
|               |                                                           | F1•••F2   | 2.879(3)   | C30–F1•••F2 = 152.98(18)<br>C31–F2•••F1 = 120.48(16) |              |    |
|               |                                                           | F12•••F12 | 2.769(3)   | C43–F12•••F12 = 118.63(17)                           |              |    |
|               |                                                           | F14•••F14 | 2.767(4)   | C45–F14•••F14 = 117.75(18)                           |              |    |
| <b>NAFXEA</b> | (IPFB)•(pyridine)                                         | I1•••N1   | 2.783(2)   | C1–I1•••N1 = 178.96(6)                               | XB           | 13 |
|               |                                                           | H3•••F3   | 2.622      | C9–H3•••F3 = 153.0                                   | HB           |    |
|               | (IPFB)•(IPFB)                                             | C6•••F2   | 3.091(4)   | C3–F2•••C6 = 148.8(2)                                | lp(F)– $\pi$ |    |
|               |                                                           | F2•••F4   | 2.972(3)   | C3–F2•••F4 = 139.01(18)<br>C6–F4•••F2 = 82.18(15)    | contact      |    |
| <b>NAFXIE</b> | (IPFB)•(3-methylpyridine)                                 | I1•••N1   | 2.7279(17) | C1–I1•••N1 = 179.53(7)                               | XB           | 13 |
|               |                                                           | H6•••F3   | 2.531      | C12–H6•••F3 = 156.0                                  | HB           |    |
|               |                                                           | H3•••F4   | 2.629      | C10–H3•••F4 = 137.0                                  |              |    |
|               |                                                           | H7•••F1   | 2.664      | C12–H7•••F1 = 152.0                                  |              |    |
| <b>NAFXUQ</b> | (IPFB)•( <i>N,N,N',N'</i> -tetramethylethane-1,2-diamine) | I1•••N1   | 2.765(2)   | C1–I1•••N1 = 178.61(18)                              | XB           | 13 |
|               |                                                           | H3•••F3   | 2.635      | C8–H3•••F3 = 149.0                                   | HB           |    |
|               |                                                           | C7•••F3   | 3.112(4)   | C4–F3•••C7 = 161.69(16)                              | contact      |    |
|               | (IPFB)•(IPFB)                                             | C2•••F2   | 2.934(3)   | C3–F2•••C2 = 141.17(15)                              | lp(F)– $\pi$ |    |
|               |                                                           | C3•••F2   | 3.129(3)   | C3–F2•••C3 = 154.56(15)                              |              |    |
| <b>NUQTIE</b> | (IPFB)•(complex Pt <sup>II</sup> )                        | I1•••C11  | 3.3330(5)  | C32–I1•••C11 = 161.47(4)                             | XB           | 14 |
|               |                                                           | C21•••F3  | 3.126(2)   | C35–F3•••C21 = 154.56(11)                            | contact      |    |
|               |                                                           | C22•••F3  | 3.125(3)   | C35–F3•••C22 = 141.87(12)                            |              |    |
|               |                                                           | C11•••F5  | 3.1280(16) | C37–F5•••C11 = 154.56(11)                            |              |    |
|               |                                                           | H7•••F3   | 2.406      | C12–H7•••F3 = 172.04                                 | HB           |    |

|                      |                            |           |                       |                          |                 |    |
|----------------------|----------------------------|-----------|-----------------------|--------------------------|-----------------|----|
|                      |                            | H9...F2   | 2.492                 | C15–H9...F2 = 160.45     |                 |    |
|                      |                            | H15...F3  | 2.547                 | C22–H15...F3 = 119.45    |                 |    |
|                      |                            | H14...F3  | 2.555                 | C21–H14...F3 = 118.79    |                 |    |
|                      |                            | H2...F5   | 2.588                 | C6–H2...F5 = 151.87      |                 |    |
|                      |                            | H8...F4   | 2.651                 | C13–H8...F4 = 135.46     |                 |    |
|                      |                            | C36...C13 | 3.207                 |                          | $\pi$ -stacking |    |
|                      |                            | C34...C18 | 3.364                 |                          |                 |    |
|                      |                            | C36...C12 | 3.392                 |                          |                 |    |
|                      | (IPFB)•(IPFB)              | F5...F5   | 2.793(2)              | C37–F5...F5 = 121.09(8)  | contact         |    |
| <b>OQIJEF</b>        | (IPFB1)•(thiourea)         | I1...S1   | 3.1770(14)            | C18–I...S1 = 171.22(13)  | XB              | 15 |
|                      |                            | H4...F4   | 2.538                 | N2–H4...F4 = 114.0       | HB              |    |
|                      | (IPFB2)•(thiourea)         | I2...S1   | 3.3205(16)            | C24–I2...S1 = 174.33(13) | XB              |    |
|                      | (IPFB1)•(benzo-18-crown-6) | C22...C5  | 3.354                 |                          | $\pi$ -stacking |    |
|                      |                            | C17...F1  | 3.001(8)              | C19–F...C17 = 160.5(4)   | contact         |    |
|                      |                            | H10...F5  | 2.649                 | C8–H10...F5 = 154.4      | HB              |    |
|                      | (IPFB2)•(benzo-18-crown-6) | C8...F6   | 3.120(9)              | C25–F6...C8 = 168.9(4)   | contact         |    |
|                      |                            | C14...F10 | 3.144(7)              | C29–F10...C14 = 142.7(3) |                 |    |
|                      |                            | H9...F6   | 2.536                 | C8–H9...F6 = 117.5       | HB              |    |
|                      |                            | H21...F10 | 2.566                 | C14–H21...F10 = 117.2    |                 |    |
| <b>OQITAL</b>        | (IPFB1)•(thiourea)         | I1...S1   | 3.1977(14)            | C20–I...S1 = 178.41(18)  | XB              | 15 |
|                      | (IPFB2)•(thiourea)         | I2...S1   | 3.2708(13)            | C26–I2...S1 = 170.0(2)   | XB              |    |
|                      | (IPFB2)•(18-crown-6)       | H40...F8  | 2.625                 | C19–H40...F8 = 141.7     | HB              |    |
| <b>OQITAL01</b>      | (IPFB1)•(thiourea)         | I1...S1   | 3.1724(8)             | C16–I1...S1 = 177.73(8)  | XB              | 15 |
|                      | (IPFB2)•(thiourea)         | I2...S1   | 3.2272(8)             | C22–I2...S1 = 168.85(9)  | XB              |    |
|                      | (IPFB1)•(18-crown-6)       | H8...F1   | 2.616                 | C3–H8...F1 = 127.5       | HB              |    |
|                      |                            | H7...F3   | 2.657                 | C3–H7...F3 = 125.88      |                 |    |
| (IPFB2)•(18-crown-6) | H32...I2                   | 3.159     | C13–H32...I2 = 133.52 | HB                       |                 |    |

|                      |                                                 |           |                      |                           |                 |    |
|----------------------|-------------------------------------------------|-----------|----------------------|---------------------------|-----------------|----|
|                      |                                                 | H36...F8  | 2.520                | C15–H36...F8 = 144.39     |                 |    |
|                      | (IPFB2)•(IPFB1)                                 | C20...F9  | 3.166(4)             | C26–F9...C20 = 105.93(19) | lp(F)– $\pi$    |    |
|                      | (IPFB1)•(IPFB1)                                 | C20...C20 | 3.310                |                           | $\pi$ -stacking |    |
| <b>OQIVER</b>        | (IPFB1)•(thiourea)                              | I2...S1   | 3.1632(8)            | C35–I2...S1 = 179.37(11)  | XB              | 15 |
|                      | (IPFB2)•(thiourea)                              | I4...S2   | 3.1592(8)            | C47–I4...S2 = 177.15(12)  | XB              |    |
|                      | (IPFB1)•(18-crown-6)                            | H40...F8  | 2.511                | C18–H40...F8 = 132.6      | HB              |    |
|                      |                                                 | H50...F6  | 2.588                | C23–H50...F6 = 155.4      |                 |    |
|                      |                                                 | H60...F8  | 2.664                | C28–H60...F8 = 131.2      |                 |    |
| (IPFB2)•(18-crown-6) | H16...F18                                       | 2.620     | C6–H16...F18 = 133.2 | HB                        |                 |    |
| <b>OQIVER01</b>      | (IPFB1)•(thiourea)                              | I2...S1   | 3.1311(5)            | C35–I2...S1 = 178.75(7)   | XB              | 15 |
|                      | (IPFB2)•(thiourea)                              | I4...S2   | 3.1301(5)            | C47–I4...S2 = 176.75(8)   | XB              |    |
|                      | (IPFB1)•(18-crown-6)                            | C18...F8  | 3.167(3)             | C38–F8...C18 = 140.64(17) | contact         |    |
|                      |                                                 | H40...F8  | 2.417                | C18–H40...F8 = 132.04     | HB              |    |
|                      |                                                 | H50...F6  | 2.547                | C23–H50...F6 = 160.10     |                 |    |
|                      |                                                 | H60...F8  | 2.599                | C28–H60...F8 = 128.72     |                 |    |
|                      | (IPFB2)•(18-crown-6)                            | H16...F18 | 2.620                | C6–H16...F18 = 133.2      | HB              |    |
|                      | (IPFB1)•(IPFB2)                                 | C37...F7  | 3.162(4)             | C37–F7...C37 = 105.51(18) | lp(F)– $\pi$    |    |
| C39...C51            |                                                 | 3.342     |                      | $\pi$ -stacking           |                 |    |
| <b>OYOMAS</b>        | (IPFB)•(4-(2-(4-decyloxy)phenyl)vinyl)pyridine) | I1...N1   | 2.7886(19)           | C6–I1...N1 = 177.86(8)    | XB              | 16 |
|                      |                                                 | H10...F5  | 2.602                | C19–H10...F5 = 140.0      | HB              |    |
|                      |                                                 | H4...F4   | 2.666                | C11–H4...F4 = 141.5       |                 |    |
|                      |                                                 | H5...F2   | 2.682                | C12–H5...F2 = 149.6       |                 |    |
| <b>TUWHOK</b>        | (IPFB)•(4-(2-thienyl)pyridine)                  | I1...N1   | 2.7670(16)           | C1–I1...N1 = 178.75(6)    | XB              | 17 |
|                      |                                                 | C15...F5  | 3.012                | C6–F5...C15 = 153.32(11)  | contact         |    |
|                      |                                                 | H2...F3   | 2.512                | C8–H2...F3 = 135.59       | HB              |    |
|                      |                                                 | H4...F2   | 2.563                | C12–H4...F2 = 155.78      |                 |    |
| <b>XOHWIB</b>        | (IPFB)•(Phenazine)                              | I1...N1   | 2.9149(16)           | C1–I1...N1 = 178.10(7)    | XB              | 18 |

|               |                                    |          |            |                                                |                 |    |
|---------------|------------------------------------|----------|------------|------------------------------------------------|-----------------|----|
|               |                                    | H7...F5  | 2.644      | C17-H7...F5 = 122.17                           | HB              |    |
|               |                                    | H5...F2  | 2.667      | C15-H5...F2 = 176.39                           |                 |    |
|               |                                    | H6...F5  | 2.679      | C16-H6...F5 = 120.49                           |                 |    |
|               |                                    | C5...C18 | 3.383      |                                                | $\pi$ -stacking |    |
|               | (IPFB)•(IPFB)                      | F5...F5  | 2.924(3)   | C6-F5...F5 = 93.21(12)                         | contact         |    |
| <b>XOHWOH</b> | (IPFB)•(Acridine)                  | I1...N1  | 2.8995(16) | C1-I1...N1 = 179.07(6)                         | XB              | 18 |
|               |                                    | H2...F2  | 2.538      | C10-H2...F2 = 130.54                           | HB              |    |
|               |                                    | H6...F5  | 2.656      | C16-H6...F5 = 120.43                           |                 |    |
|               |                                    | H7...F5  | 2.658      | C17-H7...F5 = 120.70                           |                 |    |
|               | (IPFB)•(IPFB)                      | F5...F5  | 2.872(2)   | C6-F5...F5 = 92.08(10)                         | contact         |    |
| <b>YABJAM</b> | (IPFB)•(carbene)                   | I1...C3  | 2.754(3)   | C1-I1...C3 = 178.91(14)                        | XB              | 19 |
|               |                                    | H12...I1 | 3.00       | C41-H12...I1 = 152                             | HB              |    |
|               |                                    | H4...I1  | 3.01       | C30-H4...I1 = 147                              |                 |    |
|               |                                    | H30...I1 | 3.07       | C40-H30...I1 = 145                             |                 |    |
|               |                                    | H22...I1 | 3.08       | C31-H22...I1 = 143                             |                 |    |
|               |                                    | H13...F3 | 2.451      | C34-H13...F3 = 131                             |                 |    |
|               | (IPFB)•(IPFB)                      | C13...I1 | 3.626(4)   | C1-I1...C13 = 83.99(11)                        | lp(I)- $\pi$    |    |
| <b>ZAHGAQ</b> | (IPFB)•(IPFB)                      | I1...F5  | 3.445(4)   | C1-I1...F5 = 156.79(11)                        | XB              | 20 |
|               |                                    | F2...F3  | 2.848(5)   | C3-F2...F3 = 160.0(3)<br>C4-F3...F2 = 160.8(3) | contact         |    |
|               |                                    | F1...F4  | 2.880(4)   | C2-F1...F4 = 90.0(2)<br>C5-F4...F1 = 88.6(2)   |                 |    |
|               |                                    | F3...F4  | 2.902(4)   | C4-F3...F4 = 134.9(3)<br>C5-F4...F3 = 163.3(3) |                 |    |
|               |                                    | C5...F1  | 3.146(5)   | C2-F1...C5 = 115.2(2)                          |                 |    |
|               |                                    | C4...C4  | 3.306      |                                                | $\pi$ -stacking |    |
|               | (IPFB)•(complex Cu <sup>II</sup> ) | I1...O2  | 3.038(7)   | C39-I1...O2 = 167.9(3)                         | XB              |    |
| <b>ZEQKUE</b> | (IPFB)•(complex Cu <sup>II</sup> ) | I1...O2  | 3.038(7)   | C39-I1...O2 = 167.9(3)                         | XB              | 21 |



|                                                        |                                     |           |            |                           |                 |    |
|--------------------------------------------------------|-------------------------------------|-----------|------------|---------------------------|-----------------|----|
|                                                        |                                     | H2...F5   | 2.557      | C4-H2...F5 = 119.3        | HB              |    |
|                                                        |                                     | H25...F3  | 2.586      | C36-H25...F3 = 154.5      |                 |    |
|                                                        |                                     | H5...F1   | 2.614      | C8-H5...F1 = 140.9        |                 |    |
|                                                        |                                     | H16...F4  | 2.662      | C23-H16...F4 = 158.4      |                 |    |
|                                                        |                                     | C4...F5   | 3.119(11)  | C44-F5...C4 = 125.8(6)    | contact         |    |
|                                                        |                                     | C43...C9  | 3.382      |                           | $\pi$ -stacking |    |
| <b>ZEQLAL</b>                                          | (IPFB)•(complex Ni <sup>II</sup> )  | I1...O2   | 3.0699(19) | C2-I1...O2 = 168.23(10)   | XB              | 21 |
|                                                        |                                     | H6...F4   | 2.528      | C13-H6...F4 = 120.99      | HB              |    |
|                                                        |                                     | H4...F5   | 2.579      | C10-H4...F5 = 143.2       |                 |    |
|                                                        |                                     | H24...F2  | 2.581      | C41-H24...F2 = 157.5      |                 |    |
|                                                        |                                     | H18...F1  | 2.617      | C31-H18...F1 = 158.7      |                 |    |
|                                                        |                                     | C1...C16  | 3.389      |                           | $\pi$ -stacking |    |
|                                                        |                                     | C6...C12  | 3.393      |                           |                 |    |
| [Pt(btpy)(PPh <sub>3</sub> )<br>CN]•IPFB ( <b>1c</b> ) | (IPFB)•(complex Pt <sup>II</sup> )  | I1...N1   | 2.8215(19) | C-I1...N1 = 172.21(5)     | XB              | 22 |
|                                                        |                                     | H27...F2  | 2.5114     | C27-H27...F2 = 163.66     | HB              |    |
|                                                        |                                     | H21...F3  | 2.5324     | C21-H21...F3 = 119.78     |                 |    |
|                                                        |                                     | H22...F3  | 2.5227     | C22-H22...F3 = 120.15     |                 |    |
|                                                        |                                     | H12...F3  | 2.4450     | C12-H12...F3 = 175.13     |                 |    |
| [Pt(bfpy)(PPh <sub>3</sub> )<br>CN]•IPFB ( <b>2c</b> ) | (IPFB1)•(complex Pt <sup>II</sup> ) | I1...N1C  | 2.863(2)   | C32-I...N = 175.02(5)     | XB              | 22 |
|                                                        |                                     | H8...F1   | 2.6533     | C8-H8...F1 = 120.28       | HB              |    |
|                                                        |                                     | H16...F3  | 2.666      | C16-H16...F3 = 129.05     |                 |    |
|                                                        |                                     | C34...C9  | 3.288      |                           | $\pi$ -stacking |    |
|                                                        |                                     | C32...C13 | 3.362      |                           |                 |    |
|                                                        | (IPFB2)•(complex Pt <sup>II</sup> ) | I1A...N1C | 2.815(5)   | C34A-I1A...N1C = 167.7(7) | XB              |    |
|                                                        |                                     | H7...F1A  | 2.58       | C7-H7...F1A = 128.2       | HB              |    |
|                                                        |                                     | H30...F5A | 2.37       | C30-H30...F5A = 123.3     |                 |    |
|                                                        |                                     | H12...F5A | 2.60       | C12-H12...F5A = 154.4     |                 |    |

|  |  |            |       |  |                 |  |
|--|--|------------|-------|--|-----------------|--|
|  |  | C32A•••C13 | 3.191 |  | $\pi$ -stacking |  |
|  |  | C35A•••C6  | 3.362 |  |                 |  |

**Table S5.** Cartesian atomic coordinates for model structures.

| Atom           | <i>x</i>  | <i>y</i>  | <i>z</i>  |
|----------------|-----------|-----------|-----------|
| <b>1•2IPFB</b> |           |           |           |
| Pt             | 12.609686 | 14.272423 | 6.098421  |
| I              | 13.385599 | 13.656391 | 8.479738  |
| I              | 11.742573 | 14.721891 | 3.691858  |
| I              | 11.921367 | 16.653135 | 6.900702  |
| Pt             | 14.274591 | 11.291816 | 7.849435  |
| I              | 13.498678 | 11.907848 | 5.468117  |
| I              | 15.141704 | 10.842348 | 10.255998 |
| I              | 14.962910 | 8.911104  | 7.047154  |
| I              | 11.492068 | 11.596098 | 2.057169  |
| F              | 9.232302  | 10.120549 | 0.324985  |
| F              | 11.453083 | 6.264678  | -1.145119 |
| F              | 9.211741  | 7.784830  | -1.015404 |
| F              | 13.724804 | 9.352307  | 1.544028  |
| F              | 13.711054 | 7.059779  | 0.135294  |
| C              | 11.467605 | 9.799578  | 0.986113  |
| C              | 10.348043 | 9.376815  | 0.316616  |
| C              | 12.609972 | 7.811684  | 0.196665  |
| C              | 10.329441 | 8.184920  | -0.391935 |
| C              | 11.461991 | 7.409188  | -0.463069 |
| C              | 12.610147 | 8.995192  | 0.913585  |
| I              | 15.042787 | 13.434089 | 16.005025 |
| F              | 12.783021 | 11.958540 | 14.272841 |
| F              | 15.003802 | 8.102669  | 12.802737 |
| F              | 12.762460 | 9.622820  | 12.932452 |
| F              | 17.275523 | 11.190297 | 15.491883 |
| F              | 17.261773 | 8.897770  | 14.083150 |
| C              | 15.018324 | 11.637569 | 14.933969 |
| C              | 13.898762 | 11.214805 | 14.264472 |
| C              | 16.160691 | 9.649675  | 14.144520 |
| C              | 13.880160 | 10.022910 | 13.555921 |
| C              | 15.012709 | 9.247179  | 13.484787 |
| C              | 16.160866 | 10.833182 | 14.861440 |
| I              | 15.392209 | 13.968141 | 11.890686 |
| F              | 17.651975 | 15.443690 | 13.622871 |
| F              | 15.431194 | 19.299560 | 15.092975 |
| F              | 17.672536 | 17.779409 | 14.963260 |
| F              | 13.159473 | 16.211932 | 12.403828 |

|               |           |           |           |
|---------------|-----------|-----------|-----------|
| F             | 13.173223 | 18.504460 | 13.812562 |
| C             | 15.416672 | 15.764660 | 12.961742 |
| C             | 16.536234 | 16.187424 | 13.631239 |
| C             | 14.274305 | 17.752555 | 13.751191 |
| C             | 16.554836 | 17.379319 | 14.339790 |
| C             | 15.422287 | 18.155051 | 14.410925 |
| C             | 14.274130 | 16.569047 | 13.034271 |
| I             | 11.841490 | 12.130150 | -2.057169 |
| F             | 14.101256 | 13.605699 | -0.324985 |
| F             | 11.880476 | 17.461570 | 1.145119  |
| F             | 14.121817 | 15.941419 | 1.015404  |
| F             | 9.608754  | 14.373941 | -1.544028 |
| F             | 9.622504  | 16.666469 | -0.135294 |
| C             | 11.865954 | 13.926670 | -0.986113 |
| C             | 12.985515 | 14.349433 | -0.316616 |
| C             | 10.723586 | 15.914564 | -0.196665 |
| C             | 13.004117 | 15.541329 | 0.391935  |
| C             | 11.871568 | 16.317060 | 0.463069  |
| C             | 10.723411 | 14.731057 | -0.913585 |
| <b>IKIYAE</b> |           |           |           |
| Pt            | -2.009820 | 18.528433 | 5.023030  |
| I             | -3.074587 | 19.237154 | 7.448281  |
| N             | -2.008972 | 20.603016 | 4.486537  |
| N             | 0.083668  | 19.221650 | 5.459487  |
| C             | 1.133214  | 18.489672 | 5.924037  |
| C             | 1.647952  | 20.806658 | 4.576980  |
| H             | 1.793994  | 21.622418 | 4.112430  |
| C             | -0.808030 | 21.208873 | 4.393353  |
| C             | 0.911327  | 17.322980 | 6.809285  |
| C             | -1.833307 | 23.241416 | 3.695843  |
| H             | -1.773043 | 24.144835 | 3.409439  |
| C             | -3.120758 | 21.321279 | 4.223429  |
| H             | -3.968334 | 20.903857 | 4.324835  |
| C             | 0.359238  | 20.382081 | 4.830495  |
| N             | 1.633906  | 16.226653 | 6.522882  |
| C             | 4.513084  | 21.777460 | 4.630424  |
| H             | 3.847195  | 22.451297 | 4.708534  |
| C             | -3.073124 | 22.624229 | 3.817804  |
| H             | -3.872872 | 23.098300 | 3.623214  |
| C             | 6.798176  | 21.118531 | 4.305650  |
| C             | -0.687770 | 22.519874 | 3.998691  |
| H             | 0.169124  | 22.928350 | 3.935655  |

|   |           |           |          |
|---|-----------|-----------|----------|
| C | 2.745928  | 20.039199 | 4.997678 |
| C | 2.440356  | 18.876383 | 5.695188 |
| H | 3.148341  | 18.333735 | 6.024073 |
| C | 0.105908  | 17.421372 | 7.945308 |
| H | -0.397424 | 18.208509 | 8.116603 |
| C | 5.835103  | 22.135250 | 4.418019 |
| H | 6.084322  | 23.047613 | 4.349501 |
| C | -1.950813 | 16.520935 | 5.481413 |
| H | -1.017545 | 16.225758 | 5.537598 |
| H | -2.412833 | 16.011085 | 4.782533 |
| H | -2.393687 | 16.368874 | 6.343365 |
| C | 0.781403  | 15.200095 | 8.518116 |
| H | 0.753494  | 14.439792 | 9.088183 |
| C | 4.155693  | 20.426805 | 4.730460 |
| C | 0.054155  | 16.342040 | 8.823705 |
| H | -0.467104 | 16.386764 | 9.615769 |
| C | 5.128310  | 19.445865 | 4.641387 |
| H | 4.886860  | 18.533501 | 4.729089 |
| C | 8.171941  | 21.500173 | 4.111060 |
| C | -1.275458 | 18.023651 | 3.131257 |
| H | -1.809524 | 17.290182 | 2.759892 |
| H | -0.341530 | 17.740401 | 3.209367 |
| H | -1.333720 | 18.801843 | 2.539265 |
| C | -3.869264 | 18.077320 | 4.278243 |
| H | -4.556614 | 18.393367 | 4.901754 |
| H | -3.951858 | 17.108306 | 4.168615 |
| H | -3.988978 | 18.515612 | 3.410809 |
| N | 9.278948  | 21.786405 | 3.957580 |
| C | 6.452773  | 19.794710 | 4.426241 |
| H | 7.118880  | 19.117891 | 4.361835 |
| C | 1.545512  | 15.185187 | 7.375241 |
| H | 2.039523  | 14.401031 | 7.175170 |
| I | 3.532353  | 15.470524 | 4.484755 |
| F | 3.401238  | 13.426055 | 1.995234 |
| F | 6.632549  | 16.172090 | 4.058986 |
| F | 8.472684  | 15.289542 | 2.321378 |
| F | 7.813078  | 13.506557 | 0.415217 |
| F | 5.248931  | 12.597175 | 0.234330 |
| C | 4.970351  | 14.821434 | 3.072332 |
| C | 6.258758  | 15.286561 | 3.150442 |
| C | 7.219812  | 14.848268 | 2.248750 |
| C | 6.852702  | 13.938887 | 1.271688 |

|    |           |           |           |
|----|-----------|-----------|-----------|
| C  | 5.584954  | 13.485686 | 1.182615  |
| C  | 4.634117  | 13.912052 | 2.081567  |
| I  | 7.998841  | 11.154389 | 3.385184  |
| F  | 5.149558  | 10.128427 | 2.328230  |
| F  | 6.786210  | 12.668733 | 5.933630  |
| F  | 2.643748  | 10.384843 | 3.309403  |
| F  | 4.309481  | 12.805886 | 6.973728  |
| F  | 2.142764  | 11.601328 | 5.586930  |
| C  | 6.049955  | 11.374728 | 4.115171  |
| C  | 4.961364  | 10.784375 | 3.473846  |
| C  | 5.789792  | 12.063473 | 5.290934  |
| C  | 3.461283  | 11.586420 | 5.164862  |
| C  | 4.537658  | 12.161865 | 5.810298  |
| C  | 3.684361  | 10.918546 | 3.964432  |
| Pt | 12.249456 | 11.058978 | -0.019322 |
| I  | 11.261991 | 10.316267 | 2.453755  |
| N  | 12.164797 | 8.977537  | -0.567326 |
| N  | 14.345184 | 10.302850 | 0.341218  |
| C  | 15.435622 | 11.010975 | 0.708473  |
| C  | 12.223840 | 6.312005  | -1.290873 |
| H  | 12.248563 | 5.402623  | -1.563573 |
| C  | 15.821954 | 8.601858  | -0.520734 |
| H  | 15.921118 | 7.752108  | -0.931840 |
| C  | 14.677506 | 12.245349 | 2.733855  |
| H  | 14.212342 | 11.476101 | 3.036703  |
| C  | 12.976034 | 11.595365 | -1.874643 |
| H  | 13.164068 | 10.787356 | -2.396748 |
| H  | 13.800235 | 12.114160 | -1.765015 |
| H  | 12.306732 | 12.138012 | -2.341934 |
| C  | 13.410028 | 6.991805  | -1.012691 |
| H  | 14.247376 | 6.547550  | -1.072987 |
| C  | 18.548676 | 7.447987  | -0.313811 |
| H  | 17.825009 | 6.863597  | -0.115110 |
| C  | 14.562115 | 9.105745  | -0.269960 |
| C  | 16.741888 | 10.572683 | 0.434402  |
| H  | 17.483435 | 11.118312 | 0.664621  |
| C  | 11.027462 | 8.300719  | -0.804397 |
| H  | 10.200989 | 8.759882  | -0.715324 |
| C  | 13.347745 | 8.327553  | -0.648177 |
| C  | 15.309930 | 12.260257 | 1.503278  |
| N  | 15.971923 | 13.300828 | 1.025024  |
| C  | 18.320820 | 8.816532  | -0.406995 |

|             |           |           |           |
|-------------|-----------|-----------|-----------|
| C           | 11.002679 | 6.976897  | -1.168911 |
| H           | 10.182268 | 6.526679  | -1.333354 |
| C           | 10.388443 | 11.538715 | -0.708473 |
| H           | 10.192753 | 11.016938 | -1.514240 |
| H           | 10.355182 | 12.495802 | -0.922248 |
| H           | 9.721287  | 11.335967 | -0.017815 |
| C           | 20.868451 | 7.772979  | -0.774250 |
| C           | 16.950821 | 9.341290  | -0.171294 |
| C           | 12.355100 | 13.068265 | 0.456328  |
| H           | 11.691587 | 13.563207 | -0.067147 |
| H           | 13.252455 | 13.408165 | 0.249404  |
| H           | 12.174285 | 13.190510 | 1.411464  |
| C           | 19.823382 | 6.914284  | -0.509771 |
| H           | 19.969070 | 5.975086  | -0.460439 |
| N           | 23.242167 | 6.747316  | -1.118208 |
| C           | 19.394766 | 9.663301  | -0.683806 |
| H           | 19.256186 | 10.602498 | -0.735880 |
| C           | 20.665697 | 9.135561  | -0.882508 |
| H           | 21.391810 | 9.711006  | -1.093542 |
| C           | 14.743716 | 13.393257 | 3.512215  |
| H           | 14.328384 | 13.420092 | 4.365946  |
| C           | 15.423035 | 14.493460 | 3.028481  |
| H           | 15.504858 | 15.283579 | 3.547845  |
| C           | 22.211339 | 7.203497  | -0.955136 |
| C           | 15.979950 | 14.415939 | 1.771867  |
| H           | 16.392933 | 15.191150 | 1.414205  |
| <b>IPFB</b> |           |           |           |
| I           | -2.316528 | -0.000067 | 0.000029  |
| F           | -0.151122 | 2.402463  | -0.000451 |
| F           | 3.971512  | -0.001368 | -0.000084 |
| F           | 2.586356  | 2.395165  | 0.000686  |
| F           | -0.152535 | -2.401824 | 0.000414  |
| F           | 2.587295  | -2.394259 | -0.000242 |
| C           | -0.223275 | 0.000471  | -0.000188 |
| C           | 0.504179  | 1.199737  | -0.000354 |
| C           | 1.903859  | -1.210542 | -0.000111 |
| C           | 1.904945  | 1.210494  | 0.000069  |
| C           | 2.606562  | 0.000272  | -0.000164 |
| C           | 0.504140  | -1.200107 | 0.000011  |

## References

- 1 L. Li, H. Wang, W. Wang and W. J. Jin, *CrystEngComm*, 2017, **19**, 5058–5067.
- 2 M. D. Perera, J. Desper, A. S. Sinha and C. B. Aakeröy, *CrystEngComm*, 2016, **18**, 8631–8636.
- 3 C. Präsang, A. C. Whitwood and D. W. Bruce, *Cryst. Growth Des.*, 2009, **9**, 5319–5326.
- 4 A. Wasilewska, M. Gdaniec and T. Polonski, *CSD Commun.*, 2016, CCDC 618388.
- 5 L. Catalano, S. Pérez-Estrada, G. Terraneo, T. Pilati, G. Resnati, P. Metrangolo and M. A. Garcia-Garibay, *J. Am. Chem. Soc.*, 2015, **137**, 15386–15389.
- 6 K. Eichstaedt, A. Wasilewska, B. Wicher, M. Gdaniec and T. Połoński, *Cryst. Growth Des.*, 2016, **16**, 1282–1293.
- 7 X. Pang, H. Wang, W. Wang and W. J. Jin, *Cryst. Growth Des.*, 2015, **15**, 4944–4945.
- 8 B. N. Ghosh, M. Lahtinen, E. Kalenius, P. Mal and K. Rissanen, *Cryst. Growth Des.*, 2016, **16**, 2527–2534.
- 9 H. L. Nguyen, P. N. Horton, M. B. Hursthouse, A. C. Legon and D. W. Bruce, *J. Am. Chem. Soc.*, 2003, **126**, 16–17.
- 10 W. B. Farnham, D. A. Dixon and J. C. Calabrese, *J. Am. Chem. Soc.*, 1988, **110**, 8453–8461.
- 11 A. Wasilewska, M. Gdaniec and T. Połoński, *CrystEngComm*, 2007, **9**, 203–206.
- 12 M. F. Geer, J. Mazzuca, M. D. Smith and L. S. Shimizu, *CrystEngComm*, 2013, **15**, 9923–9929.
- 13 V. Vasylyeva, L. Catalano, C. Nervi, R. Gobetto, P. Metrangolo and G. Resnati, *CrystEngComm*, 2016, **18**, 2247–2250.
- 14 V. V. Sivchik, A. I. Solomatina, Y. T. Chen, A. J. Karttunen, S. P. Tunik, P. T. Chou and I. O. Koshevoy, *Angew. Chemie - Int. Ed.*, 2015, **54**, 14057–14060.
- 15 F. Topić and K. Rissanen, *J. Am. Chem. Soc.*, 2016, **138**, 6610–6616.
- 16 H.-L. Nguyen, P. N. Horton and D. W. Bruce, *CSD Commun.*, 2016, CCDC 950717.
- 17 J. Wilson, J. S. Dal Williams, C. Petkovsek, P. Reves, J. W. Jurss, N. I. Hammer, G. S. Tschumper and D. L. Watkins, *RSC Adv.*, 2015, **5**, 82544–82548.
- 18 D. Cinčić, T. Friščić and W. Jones, *New J. Chem.*, 2008, **32**, 1776–1781.
- 19 A. J. Arduengo, M. Kline, J. C. Calabrese and F. Davidson, *J. Am. Chem. Soc.*, 1991, **113**, 9704–9705.
- 20 H. J. Frohn, S. Gorg, G. Henkel and M. Lage, *Zeitschrift fuer Anorg. und Allg. Chemier Anorg. und Allg. Chemie*, 1995, **621**, 1251–1256.
- 21 V. Nemeč, L. Fotović, T. Friščić and D. Cinčić, *Cryst. Growth Des.*, 2017, **17**, 6169–6173.
- 22 V. Sivchik, R. K. Sarker, Z.-Y. Liu, K.-Y. Chung, E. V. Grachova, A. J. Karttunen, P.-T. Chou and I. O. Koshevoy, *Chem. - A Eur. J.*, 2018, **24**, 11475–11484.
